# Supplementary material for: NSAIDs Use and Reduced Metastasis in Cancer Patients: results from a meta-analysis
Source: PubMed Central journal article supplement (PMC5431951; doi:10.1038/s41598-017-01644-0), 2017-05-12
Supplement: 41598_2017_1644_MOESM9_ESM.pdf [file 41598_2017_1644_MOESM9_ESM.pdf]

# **NSAIDs Use and Reduced Metastasis in Cancer Patients: results from a meta-analysis**

**Authors:** Xiaoping Zhao <sup>1\*</sup>, Zhi Xu <sup>2</sup>, Haoseng Li<sup>1</sup>

## **Table legend**

Supplementary Dataset 1: Reduced relative risks of distant metastasis development associated with NSAIDs use.

Supplementary Dataset 2: After removal of James L. Araujo's study, the heterogeneity among studies on pre-diagnosis use of NSAIDs decreased, and the inhibition by pre-diagnostic NSAID use slightly strengthened.

Supplementary Dataset 3: Reduced relative risks of prostate cancer metastasis development associated with NSAID use.

Supplementary Dataset 4: Reduced relative risks of breast cancer metastasis development associated with NSAID use.

Supplementary Dataset 5: Reduced relative risks of colorectal and lung cancer metastasis development associated with NSAID use.

Supplementary Dataset 6: The weak association between cancer lymph node metastasis and NSAIDs use.

Supplementary Dataset 7: The week association between breast and prostate cancer lymph node metastasis and NSAIDs use.

Supplemental table: decision of the gathered 24 studies.

Supplementary Info File: characteristics of the included studies.

Quality: included studies' quality was evaluated according to Newcastle–Ottawa Scale (NOS) criteria.
